## **Direct observation of branching MT nucleation in living animal cells.**

Vikash Verma<sup>1</sup> and Thomas J. Maresca<sup>1,2</sup>

<sup>1</sup> Biology Department, University of Massachusetts, Amherst

<sup>2</sup> Molecular and Cellular Biology Graduate Program, University of Massachusetts, Amherst

Correspondence to:  
Thomas J. Maresca  
Biology Department  
University of Massachusetts, Amherst  
Amherst, MA 01003  
Phone: 413-545-0957  
Fax: 413-545-3243  
E-mail: [tmaresca@bio.umass.edu](mailto:tmaresca@bio.umass.edu)

**Character Count:**

**Running title:** Branching MT nucleation in animal cells

1 **ABSTRACT (160 words)**

2 Centrosome-mediated microtubule (MT) nucleation has been well-characterized; however,  
3 numerous non-centrosomal MT nucleation mechanisms exist. The branching MT nucleation  
4 pathway envisages that the  $\gamma$ -tubulin ring complex ( $\gamma$ -TuRC) is recruited to MTs by the augmin  
5 complex to initiate nucleation of new MTs. While the pathway is well-conserved at a molecular  
6 and functional level, branching MT nucleation by core constituents has never been directly  
7 observed in animal cells. Here, multi-color TIRF microscopy was applied to visualize and  
8 quantitatively define the entire process of branching MT nucleation in dividing *Drosophila* cells.  
9 The stereotypical branching nucleation event entailed augmin first binding to a “mother” MT,  
10 recruitment of  $\gamma$ -TuRC after 16s, followed by nucleation 15s later of a “daughter” MT at a 36°  
11 branch angle. Daughters typically remained attached throughout their ~40s lifetime unless the  
12 mother depolymerized past the branch point. Assembly of branched MT arrays, which did not  
13 require D-TPX2 (*Drosophila* TPX2) or evident regulation by a RanGTP gradient, enhanced  
14 localized RhoA activation during cytokinesis.

15

## 1 INTRODUCTION

2 Microtubules (MT) play a central role in many biological processes including cell division,  
3 cell movement, and intracellular transport. The efficacy of MT-dependent processes depends on  
4 spatio-temporal control of MT nucleation as well as the organization of polymerized MTs into  
5 specific 3-dimensional arrays. The centrosome is a major MT nucleation center and MT array  
6 organizer. However, the fact that centrosomes are absent from most mammalian oocytes/eggs  
7 and many plant species (Budde and Heald, 2003; Clift and Schuh, 2013; Severson et al., 2016)  
8 was an early indication of the existence of acentrosomal nucleation pathways. One such  
9 acentrosomal pathway is MT-dependent branching MT nucleation, which was initially described  
10 in plants where the phenomenon was clearly visualized in cortical MT regrowth assays in a  
11 green algae (O. WASTENEYS and E. WILLIAMSON, 1989) and then quantitatively analyzed in  
12 *Arabidopsis* cortical interphase MT arrays and Tobacco BY-2 cell-free lysates (Chan et al.,  
13 2009; Liu et al., 2014; Murata et al., 2005; Nakamura et al., 2010; Walia et al., 2014).

14 Centrosome-mediated MT nucleation requires  $\gamma$ -tubulin and its associated proteins  
15 known as the  $\gamma$ -tubulin ring complex ( $\gamma$ -TuRc) (Kollman et al., 2010; Moritz et al., 2000).  $\gamma$ -TuRC  
16 is not limited to the centrosome as the complex localizes along the length of spindle MTs  
17 (Goshima et al., 2008; Zhu et al., 2008) and visualization of plant cortical arrays revealed that  
18 daughter MT branches were nucleated by mother-associated  $\gamma$ -TuRC (Murata et al., 2005). The  
19 mechanism and molecules responsible for recruiting  $\gamma$ -TuRC to mother MTs was unknown until  
20 a genome-wide RNAi screen in *Drosophila* S2 cells identified 5 dim  $\gamma$ -tubulin (DGT2-6) proteins  
21 that were required for  $\gamma$ -tubulin localization to spindle MTs, but not centrosomes (Goshima et al.,  
22 2007). Dgt2-6 formed a stable complex called augmin that was required for proper spindle  
23 assembly and function (Goshima et al., 2007). Subsequently, augmin was determined to be a  
24 conserved octameric protein complex containing DGT2-9 subunits in *Drosophila* (Uehara et al.,  
25 2009) and in human the following 8 subunits of augmin were identified: Ccdc5 (HAUS1), Cep27

1 (HAUS2), hDgt3 (HAUS3), C14orf94 (HAUS4), hDgt5 (HAUS5), hDgt6 (HAUS6), UCHL5IP  
2 (HAUS7), and Hice1 (HAUS8) (Lawo et al., 2009; Uehara et al., 2009). Hice1/HAUS8/Dgt4 has  
3 been shown to bind directly to MTs (Hsia et al., 2014; Wu et al., 2008); while the Dgt3, Dgt5,  
4 and hDgt6/HAUS6/Dgt6 subunits of augmin have been reported to bind to  $\gamma$ -TuRC via its  
5 subunit, NEDD-1 (Chen et al., 2017; Haren et al., 2006; Luders et al., 2006; Uehara et al., 2009;  
6 Zhu et al., 2008). Augmin is functionally well-conserved as depletion of augmin components in  
7 various cell types leads to reduction in spindle MT density, chromosome mis-segregation,  
8 midzone MT assembly defects, and increased incidence of cytokinesis failure (Hayward et al.,  
9 2014; Uehara and Goshima, 2010; Uehara et al., 2016; Uehara et al., 2009; Zhu et al., 2008).

10         Since the identification of augmin, the interphase cortical MT array in *Arabidopsis* has  
11 provided the best system to visualize the central players (MTs, augmin,  $\gamma$ -TuRC) during  
12 branching nucleation (Liu et al., 2014; Wang et al., 2018). The formation of augmin-dependent  
13 branched MT arrays was also visualized in *Xenopus* egg extracts (Petry et al., 2013) although  
14 the postulated steps of branching MT nucleation: 1) augmin binding, 2) recruitment of  $\gamma$ -TuRC to  
15 mother MTs, and 3) nucleation of daughter MTs were not directly observed. In the egg extract  
16 model, both RanGTP and its downstream target Targeting Protein for Xklp2 (TPX2), which  
17 mediate acentrosomal spindle assembly around DNA (Groen et al., 2009; Maresca et al., 2009)  
18 have been implicated in promoting branching MT nucleation (Alfaro-Aco et al., 2017; Petry et  
19 al., 2013). Interestingly, these factors are unlikely to contribute to branching MT nucleation in  
20 interphase cortical MT arrays in plant cells as both RanGTP and plant TPX2 are nuclear during  
21 interphase (Vos et al., 2008). There is also a discrepancy between measured branch angles  
22 across systems with plants exhibiting larger augmin-mediated branch angles ( $\sim 40^\circ$ ) than those  
23 measured in *Xenopus* egg extracts (Chan et al., 2009; Liu et al., 2014; Murata et al., 2005;  
24 Nakamura et al., 2010; Petry et al., 2013; Walia et al., 2014). Present understanding of the  
25 branching MT nucleation pathway in animal cells is limited due to the absence of direct high-

1 resolution imaging of daughter MT nucleation events by its molecular mediators. In this study,  
2 multi-color, live-cell TIRF imaging in *Drosophila Melanogaster* S2 cells, the system in which  
3 augmin was first identified (Goshima et al., 2008; Goshima et al., 2007), was applied to visualize  
4 the entire process of branching MT nucleation by augmin and  $\gamma$ -TuRC.

5

## 6 RESULTS AND DISCUSSION

7 In a prior study, we observed the assembly of astral-like MT arrays that appeared to be  
8 generated by branching MT nucleation after anaphase onset in *Drosophila* S2 cells (Verma and  
9 Maresca, 2019). To test if these arrays were generated by bona-fide branching MT nucleation  
10 events, a stable cell line co-expressing EGFP- $\alpha$ -tubulin and  $\gamma$ -tubulin-Tag-RFP-T was created  
11 and imaged with dual color, high-resolution TIRF microscopy. Centrosomal and spindle MT  
12 populations of  $\gamma$ -tubulin were observed throughout mitosis and the localization of  $\gamma$ -tubulin  
13 puncta to spindle MTs, while abundant, was transient and dynamic. Prior to anaphase onset,  
14 individual MTs could not be readily visualized by TIRF microscopy; however, post anaphase  
15 onset more stable (relative to pre-anaphase) astral MTs entered the TIRF field where they could  
16 be imaged for extended durations (often minutes). Indeed,  $\gamma$ -tubulin puncta were observed to  
17 dynamically localize to astral MTs and to reside at the sites of daughter MT nucleation (**Figure**  
18 **1A, B; Movie 1**). Quantification of a number of bona-fide branching nucleation events revealed  
19 that the lag-time between the localization of a  $\gamma$ -tubulin puncta to a mother MT and nucleation of  
20 a daughter MT was  $15.9s \pm 8.8s$  (Mean  $\pm$  S.D.,  $n = 41$  events) (**Figure 1C**). In contrast to  
21 branching MT nucleation events in *Xenopus* egg extracts where reported branch angles were  
22 shallow ( $< 10^\circ$  for 52% branching events) (Petry et al., 2013); the branching nucleation events  
23 observed in anaphase *Drosophila* S2 cells exhibited a mean branching angle of  $35.7^\circ \pm 8.8^\circ$  ( $n$   
24  $= 87$ ) and in the same orientation relative to the mother MT (**Figure 1D**). In most cases, as long  
25 as the mother MT did not depolymerize past the branch point, the daughter remained attached  
26 to the mother MT and exhibited dynamic instability. While variable, the mean lifetime of a

1 daughter MT was  $36.0s \pm 25.3s$  ( $n = 90$ ) (**Figure 1E**) and, over a typical lifetime, a dynamic  
2 daughter MT polymerized microns from the branch site (**Figure 1B**). Branches could nucleate  
3 along the length of mother MTs, and, in some cases, branching MT nucleation of  
4 “granddaughter” MTs from daughters was observed; however, split-branching of growing MT  
5 plus ends (Basnet et al., 2018) was not evident.

6 The  $36^\circ$  branch angle measured in S2 cells is entirely consistent with branching MT  
7 nucleation in cortical interphase MT arrays in plants (Chan et al., 2009; Liu et al., 2014; Murata  
8 et al., 2005; Walia et al., 2014). Multiple studies have reported that ~80% of events branched at  
9  $40^\circ$  while ~20% branched parallel to the mother MT. While the occurrence of shallow  
10 angle/parallel branching events cannot be ruled out, we could not confidently identify bona-fide  
11 parallel branch events, as defined by daughters originating from a mother-associated  $\gamma$ -TuRC,  
12 because parallel MTs were bundled during cytokinesis. It should be noted that augmin depletion  
13 in *Arabidopsis*, resulted in a majority of nucleation events (63%) becoming parallel (Liu et al.,  
14 2014) indicative of the  $40^\circ$  MT branch angle being mediated by the augmin complex.

15 It has been proposed that the augmin complex targets  $\gamma$ -TuRC to pre-existing MTs,  
16 which in turn, initiates branching MT nucleation; however, this theoretical series of events has  
17 never been directly observed in animal cells. To visualize the properties of the augmin complex  
18 and  $\gamma$ -TuRC throughout the branching MT nucleation process in *Drosophila* S2 cells, we made a  
19 stable cell line co-expressing EGFP- $\alpha$ -tubulin,  $\gamma$ -tubulin-Tag-RFP-T, and mTurquoise2-Dgt5 (an  
20 augmin subunit) and performed multi-color, live-cell TIRF microscopy. Dgt5 localized as discreet  
21 puncta to spindle MTs (**Figure 2A**) throughout mitosis. Dgt5 puncta were dynamic but typically  
22 remained localized to MTs longer than  $\gamma$ -tubulin puncta and, while bound, Dgt5 often displayed  
23 minus end directed movements, albeit many of these events were due to poleward movement of  
24 the MTs on which the puncta localized. Three-color TIRF imaging of Dgt5 (augmin complex  
25 marker),  $\gamma$ -tubulin ( $\gamma$ -TuRC marker), and  $\alpha$ -tubulin revealed the existence of two types of mother

1 MT association events. In ~23% of cases, the Dgt5 and  $\gamma$ -tubulin localized to the mother MT  
2 simultaneously – presumably as a pre-assembled complex **Supplementary Figure 1, Movie 2**).  
3 In a majority of cases (~77%); however, Dgt5 localization preceded  $\gamma$ -tubulin on the mother MT  
4 **(Figure 2B, Movie 3)**. Thus, while pre-loaded branching nucleation complexes (augmin +  $\gamma$ -  
5 TuRC) likely exist, the augmin complex typically associated with the mother MT first and  
6 recruited  $\gamma$ -TuRC from the cytosol to nucleate daughter MTs. When Dgt5 preceded  $\gamma$ -tubulin, the  
7 lag-time between augmin complex binding and  $\gamma$ -TuRC recruitment was  $14.8s \pm 8.9s$  ( $n = 21$ )  
8 **(Figure 2C)** while the time between Dgt5 binding to the mother MT, which includes both the pre-  
9 loaded (23%) and recruitment (77%) modes, and daughter nucleation was  $27.0s \pm 20.5s$  ( $n =$   
10 27) **(Figure 2D)**. The Dgt5 and  $\gamma$ -tubulin remained at the branch point throughout the lifetime of  
11 the daughter unless the mother MT depolymerized past the branch point. Upon complete  
12 depolymerization of the daughter MT, the  $\gamma$ -tubulin puncta at the branch point dissociated from  
13 the mother MT **(Figure 1B)** while the augmin complex often remained and was even capable of  
14 supporting another round of branching MT nucleation **(Figure 2B; Movie 3)**.

15 TPX2 is a highly conserved protein and its activity has been associated with multiple  
16 roles in mitosis, such as, spindle assembly (Gruss et al., 2001; Gruss et al., 2002; Ma et al.,  
17 2010; Wadsworth, 2015; Wittmann et al., 2000), MT nucleation, and MT stabilization (Alfaro-Aco  
18 et al., 2017; Groen et al., 2009; Petry et al., 2013; Reid et al., 2016; Roostalu and Surrey, 2017).  
19 In *Xenopus laevis* egg extracts branching MT nucleation events were observed following the  
20 addition of 10-20 fold molar excess TPX2 and RanGTP and branching MT nucleation was not  
21 observed in extracts depleted of endogenous TPX2 (Petry et al., 2013). One model of augmin-  
22 mediated branching MT nucleation proposes that  $\gamma$ -TuRC is recruited to augmin complex via  
23 TPX2 due to the fact that the three components co-immunoprecipitated from egg extracts (Petry  
24 et al., 2013). TPX2 contains a composite binding sequence that shows resemblance to the  
25 yeast Spc110/Pcp1 motif (SPM) and centrosomin motif (CM1)/ $\gamma$ -TuRC nucleation activator motif

1 (γ-TuNA), deletions of which resulted in reduced or no branching MT nucleation in the *Xenopus*  
2 egg extract branching assay (Alfaro-Aco et al., 2017).

3       Sequence alignment between *Xenopus laevis* (Xl) TPX2 and *Drosophila melanogaster*  
4 (*Dm*) D-TPX2 indicated that D-TPX possesses a partially conserved CM1/γ-TuNA motif  
5 “ERRRDD” while the other conserved motif, SPM, is absent (**Figure 3A**). Further investigation  
6 into the predicted secondary structure of D-TPX2 revealed that its C-terminus (190-325 amino  
7 acids) contains 5 short stretches of α-helices; and the partially conserved γ-TuNA motif lies  
8 within the predicted α-helices, as is the case for *Xenopus laevis* (**Figure 3B**) (Alfaro-Aco et al.,  
9 2017). To further investigate the role of D-TPX2 in branching MT nucleation events in  
10 *Drosophila* S2 cells, we depleted D-TPX2 using RNAi and performed live-cell TIRF microscopy  
11 in stable cell lines expressing mTurquoise2-Dgt5, γ-tubulin-Tag-RFP-T, and EGFP-α-tubulin.  
12 Consistent with previous reports from live S2 cells, spindle assembly was largely unperturbed  
13 following D-TPX2 depletion (> 95%, **Figure 3C**) (Goshima, 2011). Therefore, we were able to  
14 readily analyze the effects of D-TPX2 depletion on branching MT nucleation events post-  
15 anaphase onset. D-TPX2 depletion did not alter any major effects of TPX2 depletion on MT-  
16 dependent branching MT nucleation (**Figure 3D-F**). We measured the same branch angle  
17 (**Figure 3E**, Ctrl. RNAi:  $36.2^\circ \pm 10.4^\circ$ , n = 22; TPX2 RNAi:  $35.7^\circ \pm 9.7^\circ$ , n = 22) and lifetime of  
18 daughter MTs (**Figure 3F**. Ctrl. RNAi:  $37.7 \pm 19.8$  Sec, n = 22; TPX2 RNAi:  $47.2 \pm 20.5$  Sec, n =  
19 22) in control and D-TPX2 depleted cells. The branch frequency, as defined by the number of  
20 branching events observed in the TIRF field over a 3-minute imaging window post-anaphase  
21 onset, was also indistinguishable between control and TPX2-depleted cells. (Ctrl. RNAi:  
22 branch/1.3 min; TPX2 RNAi: branch/1.5 min, n = 44 branching events in control and TPX2 RNAi  
23 cells). Taken together, these results indicate that D-TPX2 is dispensable for branching MT  
24 nucleation in *Drosophila* despite D-TPX2 possessing a putative CM1/γ-TuNA-like motif.

25       While TPX2 has been proposed to be important for branching in *Xenopus* egg extracts,  
26 this observation in *Drosophila* S2 cells is not entirely surprising since: 1) there is a strong effect



1 of augmin depletion on spindle MT density and morphology in S2 cells (Goshima et al., 2008;  
2 Goshima et al., 2007), but 2) spindle assembly is largely unperturbed in D-TPX2 depleted cells  
3 (Goshima, 2011). If TPX2 directly contributes to branching MT nucleation in vertebrates, then it  
4 is conceivable that other factors fulfill the role of TPX2 in *Drosophila*. The RanGTP gradient that  
5 is generated around mitotic chromatin (Kalab and Heald, 2008) has also been implicated in  
6 promoting branching MT nucleation (Petry et al., 2013). We propose that RanGTP is not  
7 required for branching MT nucleation in *Drosophila* S2 cells because: 1) branching nucleation  
8 occurs at a significant distance (>5 microns) from segregating chromosomes in anaphase and  
9 2) robust branching nucleation continues throughout telophase after the nuclear envelope has  
10 reformed. In light of these observations, it would be worthwhile to investigate the requirement of  
11 RanGTP and TPX2 in MT-dependent branching MT nucleation in other model systems.

12 Augmin-dependent branching MT nucleation contributes to furrow ingression and  
13 abscission during cytokinesis (Uehara et al., 2016). To better understand how augmin-  
14 dependent branching MT nucleation may contribute to cytokinesis, we performed live-cell  
15 microscopy on dividing cells co-expressing Tag-RFP-T- $\alpha$ -Tubulin and EGFP-Rhotekin, a  
16 reporter for RhoA-GTP (Bement et al., 2005; Benink and Bement, 2005). During anaphase, we  
17 often observed amplification of Rhotekin in the vicinity of large branched MT arrays (**Figure 4A,**  
18 **4B, Movie 4**). Quantification of Rhotekin fluorescence intensity revealed that localized RhoA-  
19 GTP increased by ~30% proximal to the mother and daughter MTs during the branching MT  
20 event while a nearby cortical area where astral MTs were absent exhibited no change in  
21 Rhotekin fluorescence during the same time period (**Figure 4C, 4D**). We propose that localized  
22 amplification of RhoA-GTP by branched MT arrays is a consequence of the production of new  
23 MT plus-ends that physically contact the plasma membrane, which we recently reported were  
24 able to activate cortical RhoA through recruitment of the RhoGEF ECT2 (Verma and Maresca,  
25 2019). In the absence of augmin, compromised midzone assembly has been attributed as the  
26 cause of the observed cytokinesis defects (Uehara et al., 2016; Uehara et al., 2009), although

1 we proposed that reduced RhoA activation by branching astral MTs could also contribute to the  
2 augmin depletion phenotype.

3         The lag-time from  $\gamma$ -tubulin binding to nucleation ( $15.9. \pm 8.8s$ ) and the branch angle  
4 ( $35.7 \pm 8.8^\circ$ ) in anaphase *Drosophila* S2 cells are nearly identical to branching parameters  
5 quantified in plants (Chan et al., 2009; Liu et al., 2014; Murata et al., 2005; Nakamura et al.,  
6 2010; Walia et al., 2014). Interestingly, smaller ( $< 30^\circ$ ) branch angles have been measured in  
7 *Xenopus laevis* egg extracts (Petry et al., 2013), observed by electron tomography of  
8 metaphase spindles in human U2OS cells, and inferred from tracking EB3 comets in human  
9 HeLa and RPE1 cells (David et al., 2018). This discrepancy may stem from fundamental  
10 mechanistic and/or structural differences between the fly/plant and vertebrate branching  
11 pathways. However, we favor an alternative explanation for the observed differences in branch  
12 angles that are a consequence of two considerations: 1) the structural organization and physical  
13 properties of the augmin complex, and 2) the cellular environment in which a daughter is born.

14         Negative stain EM of the reconstituted octameric complex revealed that human augmin  
15 is a ~40-45 nm long, Y-shaped structure with a ~30 nm long stem and ~15 nm flexible splayed  
16 end that can adopt multiple conformations (Hsia et al., 2014) (**Figure 5A**). Structural analyses of  
17 a human augmin sub-complex indicated that one end of a stem-like structure contains the MT  
18 binding region (MTBR) of Hice1/HAUS8 (Hsia et al., 2014). It is compelling to postulate that the  
19 splayed Y-shaped end of the complex may contain  $\gamma$ -TuRC binding activities. In sum, the  
20 augmin complex may contain a rigid 30 nm long stem that binds MTs at one end and a flexible  
21 splayed end that recruits  $\gamma$ -TuRC. Further angular flexibility could be achieved via a flexible  
22 hinge - analogous to a wrist - between the MT-binding “arm” and  $\gamma$ -TuRC-binding “hand” (**Figure**  
23 **5A, B**). Interestingly, negative stain EM of the *Xenopus* augmin holo-complex revealed a stem-  
24 like structure bound at a nearly perpendicular angle to the MT with a fair number of MT-bound  
25 particles exhibiting hinge-like bends (Song et al., 2018).

1 Augmin complex flexibility would allow a daughter MT to sample a broad range of  
2 possible branch angles relative to its mother. We posit that this angle is ultimately dictated by  
3 the local cellular environment such that MTs born into “open” cytosol with less spatial  
4 constraints, as is the case for the equatorial astral MTs in early anaphase observed here, will  
5 have larger branch angles than daughters nucleated in the spatially constrained environment of  
6 the spindle and midzone MT array (**Figure 5C**). We envision that “unbridled” daughters  
7 nucleated in the absence of major spatial constraints would exhibit a branch angle closer to the  
8 angle at which an augmin complex binds to the mother MT. On the other hand, a daughter that  
9 encounters spatial constraints as it grows, for example in a spindle with many MTs oriented  
10 nearly parallel to the mother, would flex inward due to flexible or hinge-like parts of the augmin  
11 complex. Interestingly, mother and daughter MTs of small angle branches visualized by electron  
12 tomography in human metaphase spindles were linked by 29 nm “rods” that bound the mother  
13 at a 60° angle (Kamasaki et al., 2013). While the molecular identity of these rods was not  
14 determined, we agree with the authors’ speculation that the rods may be augmin – specifically  
15 the 30nm stem of the augmin complex (Kamasaki et al., 2013).

16 We propose that branch angle flexibility may allow the branching MT nucleation pathway  
17 to make diverse functional contributions throughout mitosis. During spindle assembly and  
18 metaphase, shallow branch angles would contribute to the establishment and maintenance of  
19 kinetochore-MT attachments. However, the functional contribution of branching is likely different  
20 in the context of pioneering astral MTs during anaphase/telophase. We recently characterized a  
21 MT-based RhoA activation pathway that functions during anaphase, telophase, and cytokinesis  
22 via recruitment of the RhoA GEF ECT2 to cortical sites contacted by MT plus-ends enriched  
23 with the centralspindlin complex (Verma and Maresca, 2019) (**Figure 5B, D**). Interestingly,  
24 larger branch angle (> 35°) MT arrays produced more plus-ends that contacted the cortex,  
25 thereby amplifying localized RhoA activation (**Figure 4A, 5D**). We posit that larger branch angle

1 nucleation from equatorial astral MTs would allow for the activation of cortical RhoA over  
2 microns - the size-scale in which a cleavage furrow is initiated and an area significantly larger  
3 than a sub-micron sized kinetochore. Furthermore, auto-catalytic amplification of astral MT  
4 arrays (Ishihara et al., 2016) via larger branch angle nucleation would more efficiently (relative  
5 to shallow branching) fill the MT array expansion volume observed in large cells (100 – 1000  
6  $\mu\text{m}$ ) during early embryonic cell divisions (Ishihara et al., 2014; Mitchison et al., 2012; Wuhr et  
7 al., 2008). Unlike actin network organization that uses distinct nucleation mechanisms and  
8 molecules for branched versus parallel arrays (Svitkina, 2013), angular flexibility of branching  
9 MT nucleation may allow a single complex to effectively assemble both branched and near  
10 parallel MT arrays.

11 Over thirty years ago, Salmon and colleagues demonstrated the power of directly  
12 observing a cellular phenomenon and quantifying its parameters by visualizing MT dynamic  
13 instability *in vitro* and in cells (Cassimeris et al., 1988; Walker et al., 1988). This work  
14 transformed thinking around MT dynamics and laid the foundation for decades of research that  
15 continues today (Heald and Khodjakov, 2015). To date, the branching MT nucleation pathway  
16 has been visualized and quantified in plants but not in animals – a significant knowledge gap  
17 given the central importance of this pathway to animal cell division (Lawo et al., 2009; Uehara et  
18 al., 2016; Uehara et al., 2009). Much like the quantification of MT dynamic instability parameters  
19 accomplished many years ago, we hope that the direct observation of branching MT nucleation  
20 and quantification of its key parameters in living animal cells reported here will inform future  
21 mechanistic models of cellular processes that depend on dynamic MTs.

22

## 1 MATERIALS AND METHODS

### 2 DNA constructs

3 The  $\gamma$ -tubulin gene (CG3157) with its endogenous promoter was amplified from the genomic  
4 DNA of *Drosophila*. The resulting PCR product was cloned between 5' KpnI and 3' EcoRI sites  
5 of the pMT/V5-His vector (Invitrogen). In-frame Tag-RFP-T gene was then introduced at the 3'  
6 end of  $\gamma$ -tubulin gene between 5' EcoRI and 3' NotI sites. The *Drosophila* DGT5 gene (augmin  
7 complex subunit, CG 8828) was PCR amplified from cDNA clone LD 47477 with a 5' SpeI site  
8 and a 3' EcoRI site. The resulting PCR product was then inserted into the 5' SpeI and 3' EcoRI  
9 sites of the pMT/V5 His-B vector (Invitrogen) containing in-frame mTurquoise2 gene at the 5'  
10 end; cloned between 5' NcoI and 3' SpeI sites; and the Mis12 promoter at the 5' end, cloned  
11 between a single Kpn1 site.

### 12 Cell culture and generation of stable cell line

13 *Drosophila* S2 cells were grown in Schneider's medium (Life Technologies) supplemented with  
14 10% heat inactivated fetal bovine serum (FBS) and 0.5x antibiotic/antimycotic cocktail (Sigma),  
15 and maintained at 25°C. Cell lines were generated by transfecting the DNA constructs  
16 containing the gene of interest with Effectene transfection reagent (Qiagen, Hilden, Germany),  
17 following the manufacturer's protocol. 4 days after transfection, expression of EGFP/Tag-RFP-  
18 T/mTurquoise2-tagged proteins was checked by fluorescence microscopy. To make a stable  
19 cell line, cells were selected in the presence of Blasticidin S HCl (Thermo Fisher Scientific,  
20 Waltham, MA) and/or Hygromycin (Sigma-Aldrich) until there was no observable cell death.  
21 Thereafter, cell lines were either frozen down or maintained in the S2 media @ 25 °C without  
22 Blasticidin and/or Hygromycin B.

### 23 RNA interference (RNAi) experiments

1 Around 500 base pairs of DNA template containing T7 promoter sequence at the 5' end for D-  
2 TPX2 (also known as Ssp1/mei-38 in *Drosophila*, CG14781) was generated by PCR. Double-  
3 stranded RNA (dsRNA) was synthesized from D-TPX2 DNA template (cDNA clone RE11134)  
4 containing T7 promoter at the 5' end at 37 °C using the T7 RiboMax Express Large-Scale RNA  
5 Production System (Promega Corp., Madison, WI), following the manufacturer's protocol. For  
6 RNAi experiments, cells at about 25% confluency were incubated in a 35 x 10 mm tissue culture  
7 dish for an hour. Thereafter, media was carefully aspirated off the dish and 1 ml of serum-free  
8 Schneider's media containing 20 µg of dsRNA was added to the dish. After 1 hour, 1 ml of fresh  
9 media containing FBS was added to the dish and incubated for 4 days at 25 °C. Depletion of  
10 endogenous D-TPX2 was confirmed by western blots.

#### 11 **Western blotting**

12 Equal amounts of proteins were loaded into an 8% SDS-PAGE gel. After running the gel,  
13 proteins were transferred to a nitrocellulose membrane using the Trans-Blot Turbo transfer  
14 system (Bio-Rad Laboratories, Inc., Hercules, CA) for 10 minutes. Subsequently, the membrane  
15 was incubated in 5% milk (W/V made in Tris-buffered saline with 0.1% Tween (TBS-T)) for one  
16 hour. Following block, the membrane was incubated with either α-D-TPX2 antibody at 1:2000  
17 dilution or α-tubulin (DM1-A, Sigma) antibody at 1:10,000 dilution for 1 hour, followed by 3X, 5  
18 minute washes in TBS-T and secondary antibody incubation at 1:5000 dilution for 1 hour.  
19 Following secondary antibody incubation, membrane was washed 3X, 5 minutes in TBS-T and  
20 developed with ECL reagent (Millipore). The blot was imaged with a G:BOX system controlled  
21 by GeneSnap software (Syngene, Cambridge, U.K.). Images were further quantified to estimate  
22 the knock down efficiency with the help of Fiji/Image J software (*Schindelin et al., 2012*). To  
23 obtain the intensity values, identical regions were drawn over each band and their integrated  
24 intensity was recorded. Intensity values were normalized to their respective loading controls  
25 (tubulin) to estimate the knockdown efficiency.

1 **Live-cell TIRF microscopy**

2 Cells at about 50% confluency, expressing the gene of interest were seeded on a 35mm glass  
3 bottom dish (Cellvis, CA, USA) coated with Concanavalin A for 30-60 minutes. Before imaging,  
4 the total volume was brought up to 2 ml with fresh Schneider's media containing FBS. Multi-  
5 color, live-cell TIRF movies of all the constructs (EGFP- $\alpha$ -tubulin and  $\gamma$ -tubulin-Tag-RFP-T;  
6 EGFP- $\alpha$ -tubulin,  $\gamma$ -tubulin-Tag-RFP-T, and mTurquoise2-Dgt5) were acquired on a Nikon Ti-E  
7 microscope equipped with a 100X 1.4 NA DIC Apo Oil immersion objective, a Hamamatsu  
8 ORCA-Flash 4.0 LT digital CMOS camera (C11440), 4 laser lines (447 nm, 488 nm, 561 nm,  
9 641 nm), and MetaMorph software. MetaMorph software (Molecular Devices) was used to  
10 control the imaging systems.

11

12 **ACKNOWLEDGMENTS**

13 We acknowledge Patricia Wadsworth (UMass, Amherst) for sharing many insightful  
14 conversations. We would like to thank Gohta Goshima (Nagoya University, Nagoya, Japan) for  
15 sharing the  $\alpha$ -D-TPX2 (Ssp1/Mei-38) serum. We acknowledge Ted Salmon for inspiring this  
16 work and for consistently demonstrating the power of observation and quantification of cellular  
17 phenomena using high resolution light microscopy. This work was supported by a National  
18 Institutes of Health grant (GM107026) to T.J.M.



1 **REFERENCES**

- 2
- 3 Alfaro-Aco, R., A. Thawani, and S. Petry. 2017. Structural analysis of the role of TPX2 in  
4 branching microtubule nucleation. *J Cell Biol.* 216:983-997.
- 5 Basnet, N., H. Nedozralova, A.H. Crevenna, S. Bodakuntla, T. Schlichthaerle, M. Taschner, G.  
6 Cardone, C. Janke, R. Jungmann, M.M. Magiera, C. Biertumpfel, and N. Mizuno. 2018.  
7 Direct induction of microtubule branching by microtubule nucleation factor SSNA1. *Nat*  
8 *Cell Biol.* 20:1172-1180.
- 9 Bement, W.M., H.A. Benink, and G. von Dassow. 2005. A microtubule-dependent zone of active  
10 RhoA during cleavage plane specification. *J. Cell Biol.* 170:91-101.
- 11 Benink, H.A., and W.M. Bement. 2005. Concentric zones of active RhoA and Cdc42 around  
12 single cell wounds. *J Cell Biol.* 168:429-439.
- 13 Budde, P.P., and R. Heald. 2003. Centrosomes and kinetochores, who needs 'Em? The role of  
14 noncentromeric chromatin in spindle assembly. *Curr Top Dev Biol.* 56:85-113.
- 15 Cassimeris, L., N.K. Pryer, and E.D. Salmon. 1988. Real-time observations of microtubule  
16 dynamic instability in living cells. *J Cell Biol.* 107:2223-2231.
- 17 Chan, J., A. Sambade, G. Calder, and C. Lloyd. 2009. Arabidopsis cortical microtubules are  
18 initiated along, as well as branching from, existing microtubules. *Plant Cell.* 21:2298-  
19 2306.
- 20 Chen, J.W.C., Z.A. Chen, K.B. Rogala, J. Metz, C.M. Deane, J. Rappsilber, and J.G. Wakefield.  
21 2017. Cross-linking mass spectrometry identifies new interfaces of Augmin required to  
22 localise the gamma-tubulin ring complex to the mitotic spindle. *Biol Open.* 6:654-663.
- 23 Clift, D., and M. Schuh. 2013. Restarting life: fertilization and the transition from meiosis to  
24 mitosis. *Nat Rev Mol Cell Biol.* 14:549-562.
- 25 David, A.F., P. Roudot, W.R. Legant, E. Betzig, G. Danuser, and D.W. Gerlich. 2018. Augmin-  
26 mediated amplification of long-lived spindle microtubules directs plus-ends to  
27 kinetochores. *bioRxiv:501445*.
- 28 Goshima, G. 2011. Identification of a TPX2-like microtubule-associated protein in Drosophila.  
29 *PLoS One.* 6:e28120.
- 30 Goshima, G., M. Mayer, N. Stuurman, and R.D. Vale. 2008. Augmin: a protein complex required  
31 for centrosome-independent microtubule generation within the spindle. *J. Cell Biol.*  
32 181:421-429.
- 33 Goshima, G., R. Wollman, S.S. Goodwin, N. Zhang, J.M. Scholey, R.D. Vale, and N. Stuurman.  
34 2007. Genes required for mitotic spindle assembly in Drosophila S2 cells. *Science.*  
35 316:417-421.
- 36 Groen, A.C., T.J. Maresca, J.C. Gatlin, E.D. Salmon, and T.J. Mitchison. 2009. Functional  
37 overlap of microtubule assembly factors in chromatin-promoted spindle assembly. *Mol*  
38 *Biol Cell.* 20:2766-2773.
- 39 Gruss, O.J., R.E. Carazo-Salas, C.A. Schatz, G. Guarguaglini, J. Kast, M. Wilm, N. Le Bot, I.  
40 Vernos, E. Karsenti, and I.W. Mattaj. 2001. Ran induces spindle assembly by reversing  
41 the inhibitory effect of importin alpha on TPX2 activity. *Cell.* 104:83-93.
- 42 Gruss, O.J., M. Wittmann, H. Yokoyama, R. Pepperkok, T. Kufer, H. Sillje, E. Karsenti, I.W.  
43 Mattaj, and I. Vernos. 2002. Chromosome-induced microtubule assembly mediated by  
44 TPX2 is required for spindle formation in HeLa cells. *Nat Cell Biol.* 4:871-879.
- 45 Haren, L., M.H. Remy, I. Bazin, I. Callebaut, M. Wright, and A. Merdes. 2006. NEDD1-  
46 dependent recruitment of the gamma-tubulin ring complex to the centrosome is  
47 necessary for centriole duplication and spindle assembly. *J Cell Biol.* 172:505-515.
- 48 Hayward, D., J. Metz, C. Pellacani, and J.G. Wakefield. 2014. Synergy between multiple  
49 microtubule-generating pathways confers robustness to centrosome-driven mitotic  
50 spindle formation. *Dev. Cell.* 28:81-93.



- 1 Heald, R., and A. Khodjakov. 2015. Thirty years of search and capture: The complex simplicity  
2 of mitotic spindle assembly. *J Cell Biol.* 211:1103-1111.
- 3 Hsia, K.C., E.M. Wilson-Kubalek, A. Dottore, Q. Hao, K.L. Tsai, S. Forth, Y. Shimamoto, R.A.  
4 Milligan, and T.M. Kapoor. 2014. Reconstitution of the augmin complex provides insights  
5 into its architecture and function. *Nat Cell Biol.* 16:852-863.
- 6 Ishihara, K., K.S. Korolev, and T.J. Mitchison. 2016. Physical basis of large microtubule aster  
7 growth. *Elife.* 5.
- 8 Ishihara, K., P.A. Nguyen, A.C. Groen, C.M. Field, and T.J. Mitchison. 2014. Microtubule  
9 nucleation remote from centrosomes may explain how asters span large cells. *Proc Natl  
10 Acad Sci U S A.* 111:17715-17722.
- 11 Kalab, P., and R. Heald. 2008. The RanGTP gradient - a GPS for the mitotic spindle. *J Cell Sci.*  
12 121:1577-1586.
- 13 Kamasaki, T., E. O'Toole, S. Kita, M. Osumi, J. Usukura, J.R. McIntosh, and G. Goshima. 2013.  
14 Augmin-dependent microtubule nucleation at microtubule walls in the spindle. *J. Cell  
15 Biol.* 202:25-33.
- 16 Kollman, J.M., J.K. Polka, A. Zelter, T.N. Davis, and D.A. Agard. 2010. Microtubule nucleating  
17 gamma-TuSC assembles structures with 13-fold microtubule-like symmetry. *Nature.*  
18 466:879-882.
- 19 Lawo, S., M. Bashkurov, M. Mullin, M.G. Ferreria, R. Kittler, B. Habermann, A. Tagliaferro, I.  
20 Poser, J.R. Hutchins, B. Hegemann, D. Pinchev, F. Buchholz, J.M. Peters, A.A. Hyman,  
21 A.C. Gingras, and L. Pelletier. 2009. HAUS, the 8-subunit human Augmin complex,  
22 regulates centrosome and spindle integrity. *Curr Biol.* 19:816-826.
- 23 Liu, T., J. Tian, G. Wang, Y. Yu, C. Wang, Y. Ma, X. Zhang, G. Xia, B. Liu, and Z. Kong. 2014.  
24 Augmin triggers microtubule-dependent microtubule nucleation in interphase plant cells.  
25 *Curr Biol.* 24:2708-2713.
- 26 Luders, J., U.K. Patel, and T. Stearns. 2006. GCP-WD is a gamma-tubulin targeting factor  
27 required for centrosomal and chromatin-mediated microtubule nucleation. *Nat Cell Biol.*  
28 8:137-147.
- 29 Ma, N., U.S. Tulu, N.P. Ferez, C. Fagerstrom, A. Wilde, and P. Wadsworth. 2010. Poleward  
30 transport of TPX2 in the mammalian mitotic spindle requires dynein, Eg5, and  
31 microtubule flux. *Mol Biol Cell.* 21:979-988.
- 32 Maresca, T.J., A.C. Groen, J.C. Gatlin, R. Ohi, T.J. Mitchison, and E.D. Salmon. 2009. Spindle  
33 assembly in the absence of a RanGTP gradient requires localized CPC activity. *Curr  
34 Biol.* 19:1210-1215.
- 35 Mitchison, T., M. Wuhr, P. Nguyen, K. Ishihara, A. Groen, and C.M. Field. 2012. Growth,  
36 interaction, and positioning of microtubule asters in extremely large vertebrate embryo  
37 cells. *Cytoskeleton (Hoboken).* 69:738-750.
- 38 Moritz, M., M.B. Braunfeld, V. Guenebaut, J. Heuser, and D.A. Agard. 2000. Structure of the  
39 gamma-tubulin ring complex: a template for microtubule nucleation. *Nat Cell Biol.* 2:365-  
40 370.
- 41 Murata, T., S. Sonobe, T.I. Baskin, S. Hyodo, S. Hasezawa, T. Nagata, T. Horio, and M.  
42 Hasebe. 2005. Microtubule-dependent microtubule nucleation based on recruitment of  
43 gamma-tubulin in higher plants. *Nat. Cell Biol.* 7:961-968.
- 44 Nakamura, M., D.W. Ehrhardt, and T. Hashimoto. 2010. Microtubule and katanin-dependent  
45 dynamics of microtubule nucleation complexes in the acentrosomal Arabidopsis cortical  
46 array. *Nat Cell Biol.* 12:1064-1070.
- 47 O. WASTENEYS, G., and R. E. WILLIAMSON. 1989. Reassembly of microtubules in  
48 *Nitella tasmanica*: assembly of cortical microtubules in branching clusters  
49 and its relevance to steady-state microtubule assembly. *Journal of Cell Science.* 93:705-  
50 714.

- 1 Petry, S., A.C. Groen, K. Ishihara, T.J. Mitchison, and R.D. Vale. 2013. Branching microtubule  
2 nucleation in *Xenopus* egg extracts mediated by augmin and TPX2. *Cell*. 152:768-777.
- 3 Reid, T.A., B.M. Schuster, B.J. Mann, S.K. Balchand, M. Plooster, M. McClellan, C.E. Coombes,  
4 P. Wadsworth, and M.K. Gardner. 2016. Suppression of microtubule assembly kinetics  
5 by the mitotic protein TPX2. *J Cell Sci*. 129:1319-1328.
- 6 Roostalu, J., and T. Surrey. 2017. Microtubule nucleation: beyond the template. *Nat Rev Mol*  
7 *Cell Biol*. 18:702-710.
- 8 Schindelin, J., I. Arganda-Carreras, E. Frise, V. Kaynig, M. Longair, T. Pietzsch, S. Preibisch, C.  
9 Rueden, S. Saalfeld, B. Schmid, J.Y. Tinevez, D.J. White, V. Hartenstein, K. Eliceiri, P.  
10 Tomancak, and A. Cardona. 2012. Fiji: an open-source platform for biological-image  
11 analysis. *Nat Methods*. 9:676-682.
- 12 Severson, A.F., G. von Dassow, and B. Bowerman. 2016. Oocyte Meiotic Spindle Assembly  
13 and Function. *Curr Top Dev Biol*. 116:65-98.
- 14 Song, J.G., M.R. King, R. Zhang, R.S. Kadzik, A. Thawani, and S. Petry. 2018. Mechanism of  
15 how augmin directly targets the gamma-tubulin ring complex to microtubules. *J Cell Biol*.  
16 217:2417-2428.
- 17 Svitkina, T.M. 2013. Ultrastructure of protrusive actin filament arrays. *Curr Opin Cell Biol*.  
18 25:574-581.
- 19 Uehara, R., and G. Goshima. 2010. Functional central spindle assembly requires de novo  
20 microtubule generation in the interchromosomal region during anaphase. *J. Cell Biol*.  
21 191:259-267.
- 22 Uehara, R., T. Kamasaki, S. Hiruma, I. Poser, K. Yoda, J. Yajima, D.W. Gerlich, and G.  
23 Goshima. 2016. Augmin shapes the anaphase spindle for efficient cytokinetic furrow  
24 ingression and abscission. *Mol Biol Cell*. 27:812-826.
- 25 Uehara, R., R.S. Nozawa, A. Tomioka, S. Petry, R.D. Vale, C. Obuse, and G. Goshima. 2009.  
26 The augmin complex plays a critical role in spindle microtubule generation for mitotic  
27 progression and cytokinesis in human cells. *Proc. Nat'l. Acad. Sci. USA*. 106:6998-7003.
- 28 Verma, V., and T.J. Maresca. 2019. Microtubule plus-ends act as physical signaling hubs to  
29 activate RhoA during cytokinesis. *Elife*. 8.
- 30 Vos, J.W., L. Pieuchot, J.L. Evrard, N. Janski, M. Bergdoll, D. de Ronde, L.H. Perez, T. Sardon,  
31 I. Vernos, and A.C. Schmit. 2008. The plant TPX2 protein regulates prospindle assembly  
32 before nuclear envelope breakdown. *Plant Cell*. 20:2783-2797.
- 33 Wadsworth, P. 2015. TPX2. *Curr Biol*. 25:R1156-1158.
- 34 Walia, A., M. Nakamura, D. Moss, V. Kirik, T. Hashimoto, and D.W. Ehrhardt. 2014. GCP-WD  
35 mediates gamma-TuRC recruitment and the geometry of microtubule nucleation in  
36 interphase arrays of *Arabidopsis*. *Curr Biol*. 24:2548-2555.
- 37 Walker, R.A., E.T. O'Brien, N.K. Pryer, M.F. Soboeiro, W.A. Voter, H.P. Erickson, and E.D.  
38 Salmon. 1988. Dynamic instability of individual microtubules analyzed by video light  
39 microscopy: rate constants and transition frequencies. *J Cell Biol*. 107:1437-1448.
- 40 Wang, G., C. Wang, W. Liu, Y. Ma, L. Dong, J. Tian, Y. Yu, and Z. Kong. 2018. Augmin  
41 Antagonizes Katanin at Microtubule Crossovers to Control the Dynamic Organization of  
42 Plant Cortical Arrays. *Curr Biol*. 28:1311-1317 e1313.
- 43 Wittmann, T., M. Wilm, E. Karsenti, and I. Vernos. 2000. TPX2, A novel xenopus MAP involved  
44 in spindle pole organization. *J Cell Biol*. 149:1405-1418.
- 45 Wu, G., Y.T. Lin, R. Wei, Y. Chen, Z. Shan, and W.H. Lee. 2008. Hice1, a novel microtubule-  
46 associated protein required for maintenance of spindle integrity and chromosomal  
47 stability in human cells. *Mol Cell Biol*. 28:3652-3662.
- 48 Wuhr, M., Y. Chen, S. Dumont, A.C. Groen, D.J. Needleman, A. Salic, and T.J. Mitchison. 2008.  
49 Evidence for an upper limit to mitotic spindle length. *Curr Biol*. 18:1256-1261.

1 Zhu, H., J.A. Coppinger, C.Y. Jang, J.R. Yates, 3rd, and G. Fang. 2008. FAM29A promotes  
2 microtubule amplification via recruitment of the NEDD1-gamma-tubulin complex to the  
3 mitotic spindle. *J Cell Biol.* 183:835-848.

4

5

## 1 **FIGURE LEGENDS**

2 **Figure 1. Direct visualization of branching MT nucleation in *Drosophila* S2 cells.** (A) Two-  
3 color TIRF imaging of an astral MT in a post-anaphase cell co-expressing EGFP- $\alpha$ -tubulin  
4 (green), and  $\gamma$ -tubulin-Tag-RFP-T (red). This representative branching event encompasses  $\gamma$ -  
5 tubulin landing on the mother MT through disassembly of the daughter MT, both of which  
6 contact the cortex (white line at 00:26). (B) Kymograph of the branching event from region  
7 (dashed line at 00:04) in Figure 1A. (C) Histogram of the lag-time between  $\gamma$ -tubulin recruitment  
8 to the mother MT and birth of a daughter MT,  $n = 41$ . (D) Distribution of branch angles between  
9 mother and daughter MTs. The branch angles were measured 5-10s after the appearance of  
10 daughter MTs,  $n = 87$ . (E) Dot plot shows distribution of lifetime of daughter MTs,  $n = 90$ ,  
11 lifetime is time from birth to death of the daughter MT. Time: mins:secs. Scale bars, 5  $\mu$ m (A, B).  
12 Mean  $\pm$  SD values are reported in all the histograms. Error bars on the dot plot indicate  $\pm$  SD.

13  
14 **Figure 2. Direct visualization of the key mediators of branching MT nucleation.** (A)  
15 Representative TIRF micrographs showing expression and localization of  $\gamma$ -tubulin-Tag-RFP-T  
16 (red) and mTurquoise2-Dgt5 (blue) in a mid-anaphase *Drosophila* S2 cell. Inset shows a  
17 representative MT branching event where mTurquoise2-Dgt5 and  $\gamma$ -tubulin-Tag-RFP-T co-  
18 localized. (B) Still-frames from a TIRF time-lapse of MT branching events in a cell co-expressing  
19 GFP- $\alpha$ -tubulin (green), mTurquoise2-Dgt5 (blue), and  $\gamma$ -tubulin-TagRFP (red). The events  
20 include: 1) localization of two Dgt5 puncta at 10s on mother MT (one indicated by the red circle  
21 and marked 1, another indicated by the red arrow head and marked 2 in the mTurquoise2  
22 channel), 2) Dgt5 puncta (1) recruits  $\gamma$ -tubulin (1) (RFP channel, 0:20). The  $\gamma$ -tubulin puncta (1)  
23 dissociates from Dgt5 (1) within 30s without a branch event; although, the Dgt5 puncta (1)  
24 remains associated with the mother. 3) Dgt5 (2) recruits  $\gamma$ -tubulin (2) (RFP channel, 0:50) and  
25 this complex nucleates a daughter within 30 s (1:20). 4) Dgt5 puncta (now denoted 1\*) recruits a

1 second  $\gamma$ -tubulin (3) (RFP channel, 1:30), which nucleates a branch within 20s (1:40). The first  
2 daughter MT grows for 20 seconds (plus-end indicated by white arrow heads in GFP channel)  
3 while the second daughter MT was born shortly before the mother depolymerizes. The asterisk  
4 (GFP channel, 1:20) indicates a rare event in which a daughter with minus-end associated  $\gamma$ -  
5 tubulin and Dgt5 dissociates from an intact mother. The unattached daughter depolymerized  
6 completely within 20s. (C) Average lag-time between mTurquoise2-Dgt5 (augmin complex  
7 subunit) binding to the mother MT and recruitment of  $\gamma$ -tubulin-TagRFP-T,  $n = 21$ . Binding of  
8 pre-assembled complexes of Dgt5 and  $\gamma$ -tubulin, which occurred 23% of the time, are excluded  
9 from the histogram. (D) Histogram of lag-time between Dgt5 recruitment to the mother MT and  
10 birth of a daughter MT,  $n = 27$ . Time: mins:secs. Scale bars, 5  $\mu\text{m}$  (A), 1  $\mu\text{m}$  (A-inset, B). Mean  
11  $\pm$  SD values are reported.

12

13 **Figure 3. Branching MT nucleation is unaffected by D-TPX2 depletion.** (A) Protein  
14 sequences of *Xenopus laevis* (*Xl*) TPX2 and *Drosophila melanogaster* (*Dm*) TPX2 (D-TPX2)  
15 were aligned with T-Coffee multiple alignment software. Red dashed rectangle indicates a  
16 partially conserved CM1/ $\gamma$ -TuNA motif in D-TPX2. (B) Secondary structure prediction of D-TPX2  
17 was generated using PSIPRED bioinformatics software. Partially conserved CM1/ $\gamma$ -TuNA motif  
18 is expected to lie within  $\alpha$ -helices (indicated with red dashed square). (C) Western blot showing  
19 depletion of endogenous TPX2 with tubulin as a loading control. (D) A representative MT  
20 branching event in a D-TPX2 depleted cell co-expressing GFP- $\alpha$ -tubulin (green), mTurquoise2-  
21 Dgt5 (blue), and  $\gamma$ -tubulin-TagRFP (red). Timepoint 00:00 indicates landing of a Dgt5 molecule,  
22 which recruits  $\gamma$ -tubulin at 0:15. The Dgt5- $\gamma$ -tubulin complex nucleates a MT branch at 0:35. (E)  
23 Distribution of branch angles in control and D-TPX2 depleted cells,  $n = 44$ . (F) Lifetime of  
24 branched daughter microtubules in control and D-TPX2 depleted cells,  $n = 44$ . Time: mins:secs.  
25 Scale bar, 1  $\mu\text{m}$ . Box plots indicate full range of variation (from min to max), the interquartile

1 range and the median. Two-tailed p-values of Student's t-tests are reported, n.s. is not  
2 significant or  $p > 0.05$ .

3 **Figure 4. Branching MT nucleation amplifies RhoA activation during cytokinesis.** (A) The  
4 active RhoA reporter Rhotekin is enriched near the MT plus-ends of branched MT arrays (top);  
5 Enlarged views of the region indicated in the inset (red dashed box) of the branched MT array  
6 that activates cortical RhoA (bottom). (B) Fold change in Rhotekin fluorescence intensity near  
7 the MT plus-ends with respect to a nearby cortical region devoid of astral MTs, data were  
8 pooled from 3 independent experiments ( $n = 3$ ). (C) Still-frames from a multi-color TIRF time-  
9 lapse showing a branching event that locally increases cortical RhoA activation - visualized with  
10 Rhotekin. (D) Rhotekin fluorescence increases ~30% (red) proximal to the mother and daughter  
11 MTs during the branching nucleation event shown in (C). A nearby cortical region devoid of  
12 astral MTs (blue) exhibited no change in Rhotekin fluorescence during the same time period.  
13 Red boxes correspond to the time points in (C). Error bars indicate SD. Time: mins:secs. Color  
14 wedge, pixel values 150-1200. Scale bars, 5  $\mu\text{m}$  (A) 1  $\mu\text{m}$  (C).

15  
16 **Figure 5. Model of augmin-mediated branching MT nucleation and its role in cytokinesis.**

17 Based upon negative stain EM of the augmin complex; we propose that the augmin complex  
18 contains a rigid ~30 nm long stem that binds MTs at one end; and a ~15 nm flexible splayed  
19 end that recruits  $\gamma$ -TuRC through Dgt6 and possibly other interfaces. MTBR = microtubule  
20 binding region in Hice 1/HAUS8. (B) Key to molecular schematics in the figure. Note the  
21 overlaid "Y" on the augmin complex schematic, which is drawn based on negative stain EM of  
22 the complex. (C) A flexible hinge region in the augmin complex and/or flexibility in the splayed  
23 Y-end of augmin may allow a daughter MT to sample a broad range of possible branch angles  
24 relative to its mother. The branch angle is impacted by the local cellular environment such that  
25 "unbridled" daughter MTs with less spatial constraints (e.g. astral MTs in anaphase) would have  
26 larger branch angles than daughters nucleated in the spatially "constrained" environment of the

1 spindle and midzone MT array. (D) Branched MT arrays may amplify RhoA activation by  
2 generating more MT plus-ends that are capable of recruiting cortical ECT2 via direct interaction  
3 with plus-end bound (polo-phosphorylated) centralspindlin.

4

5 **Supplementary Figure 1.** A MT branching event during anaphase in a cell co-expressing GFP-  
6  $\alpha$ -tubulin (green), mTurquoise2-Dgt5 (blue), and  $\gamma$ -tubulin-TagRFP-T (red). Co-localized Dgt5  
7 and  $\gamma$ -tubulin (timepoint 00:00) nucleates a MT branching event at 00:10. Subsequent frames  
8 show polymerization (00:10 - 00:25) and depolymerization (00:30 - 00:45) of the daughter MT.  
9 Time: mins:secs. Scale bar, 5  $\mu$ m.

10

## 11 SUPPLEMENTAL MOVIES

12 **Movie 1: Direct observation of  $\gamma$ -tubulin-mediated MT branching.** Time-lapse TIRF  
13 microscopy showing a  $\gamma$ -tubulin-mediated MT branching event in an anaphase *Drosophila* S2  
14 cell co-expressing EGFP- $\alpha$ -tubulin (green) and  $\gamma$ -tubulin-Tag-RFP-T (red). The mother MT and  
15 daughter MT both contact the plasma membrane. In the montage,  $\gamma$ -tubulin-Tag-RFP-T is in the  
16 upper left panel, EGFP- $\alpha$ -tubulin is in the upper right panel, and the merge is in the lower left  
17 panel. Time: mins:secs. Scale bar, 1  $\mu$ m

18 **Movie 2: Direct visualization of augmin-mediated MT branching.** Time-lapse TIRF  
19 microscopy showing a MT branching event in an anaphase *Drosophila* S2 cell co-expressing  
20 EGFP- $\alpha$ -tubulin (green),  $\gamma$ -tubulin-Tag-RFP-T (red), and mTurquoise2-Dgt5 (blue). In the  
21 montage,  $\gamma$ -tubulin-Tag-RFP-T is in the upper left panel, mTurquoise2-Dgt5 is in the upper right  
22 panel, EGFP- $\alpha$ -tubulin is in the lower left panel, and the merge is in the lower right panel. Time:  
23 mins:secs. Scale bar, 1  $\mu$ m



1 **Movie 3: Direct visualization of augmin-mediated MT branching.** Time-lapse TIRF  
2 microscopy showing two microtubule branching events in a cell co-expressing EGFP- $\alpha$ -tubulin  
3 (green),  $\gamma$ -tubulin-Tag-RFP-T (red), and mTurquoise2-Dgt5 (blue) in an anaphase *Drosophila*  
4 S2 cell. Two Dgt5 puncta bind to a mother MT (one indicated by an arrow ( $\leftarrow$ ) and another by a  
5 left caret ( $\langle$ ) in the Dgt5 channel). One Dgt5 puncta ( $\langle$ ) recruits a  $\gamma$ -tubulin (left caret ( $\langle$ ) in RFP  
6 channel, indicated by 1) at 00:20; however, this  $\gamma$ -tubulin dissociates from Dgt5 at 00:50 without  
7 nucleating a daughter. The second Dgt5 puncta ( $\leftarrow$ ) recruits  $\gamma$ -tubulin at 00:50 (indicated by an  
8 arrow ( $\leftarrow$ ) and designated 2) and nucleates a daughter MT at 01:20. The first Dgt5 puncta ( $\langle$ )  
9 remains localized to the mother and recruits another  $\gamma$ -tubulin (left caret ( $\langle$ ) in RFP channel,  
10 indicated by 3) at 01:30, which nucleates a daughter MT at 01:40 shortly before the mother MT  
11 depolymerizes (01:50 - 02:10). In the montage,  $\gamma$ -tubulin-Tag-RFP-T is in the upper left panel,  
12 mTurquoise2-Dgt5 is in the upper right panel, EGFP- $\alpha$ -tubulin is in the lower left panel, and the  
13 merge is in the lower right panel. Time: mins:secs. Scale bar, 1  $\mu$ m

14 **Movie 4: Branched MT arrays amplify RhoA activation near the cortex.** Time-lapse TIRF  
15 microscopy of an anaphase *Drosophila* S2 cell co-expressing Tag-RFP-T- $\alpha$ -tubulin and  
16 Rhotekin-GFP (a marker for active RhoA) activation near the branched MT arrays in a in  
17 *Drosophila* S2 cells. Enriched Rhotekin signal is observed near the branched MT arrays; while  
18 the nearby region devoid of MT plus-ends does not exhibit Rhotekin enrichment. In the  
19 montage,  $\gamma$ -tubulin-Tag-RFP-T is in the upper left panel, Rhotekin-EGFP is in the upper right  
20 panel, and the merge is in the lower left panel. Time: mins:secs. Scale bar, 5  $\mu$ m.



# Figure 1

bioRxiv preprint doi: <https://doi.org/10.1101/613463>; this version posted April 19, 2019. The copyright holder for this preprint (which was not certified by peer review) is the author/funder, who has granted bioRxiv a license to display the preprint in perpetuity. It is made available under aCC-BY-NC-ND 4.0 International license.

**A**

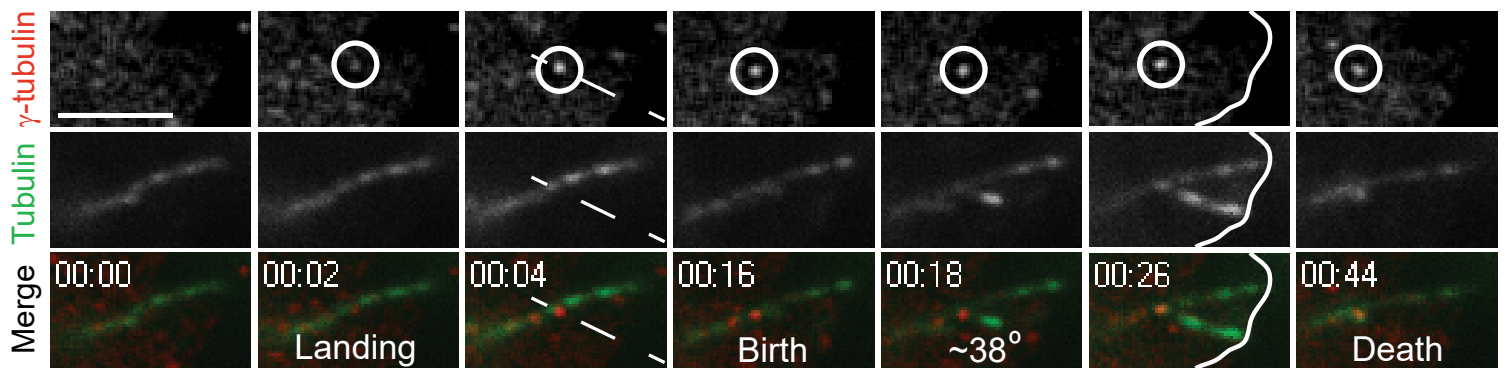

**B**

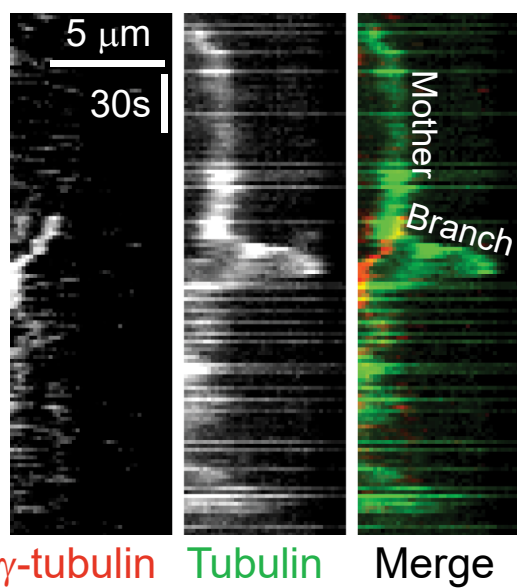

**C**

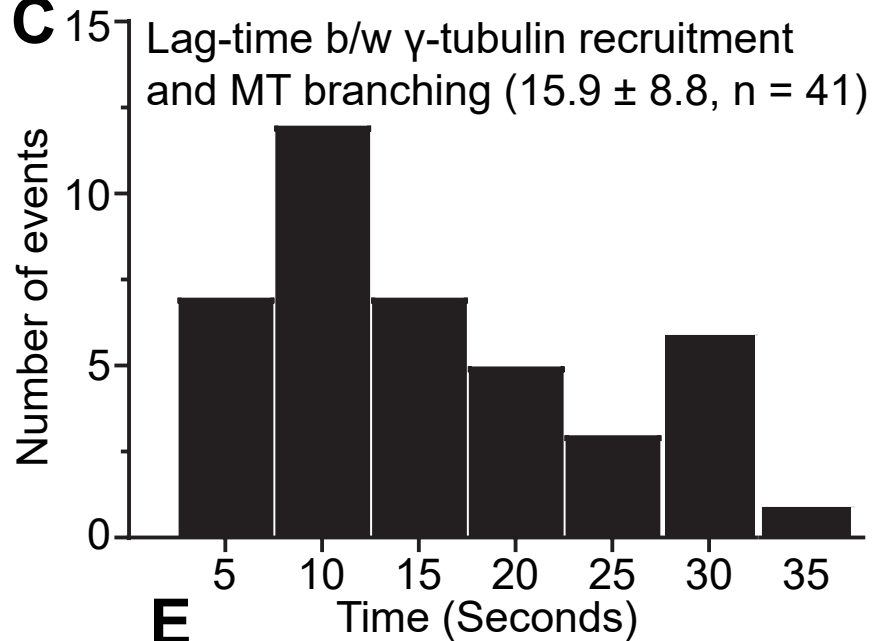

**D**

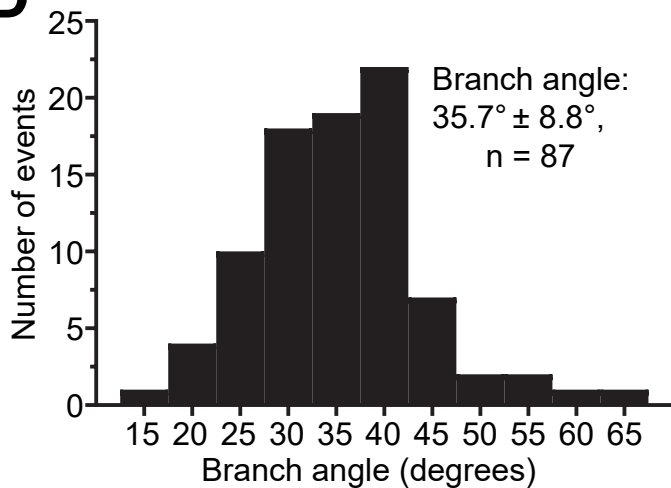

**E**

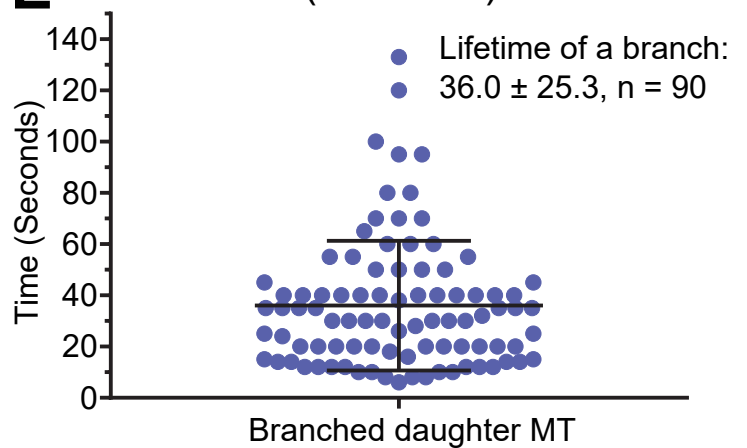

# Figure 2

bioRxiv preprint doi: <https://doi.org/10.1101/613463>; this version posted April 19, 2019. The copyright holder for this preprint (which was not certified by peer review) is the author/funder, who has granted bioRxiv a license to display the preprint in perpetuity. It is made available under aCC-BY-NC-ND 4.0 International license.

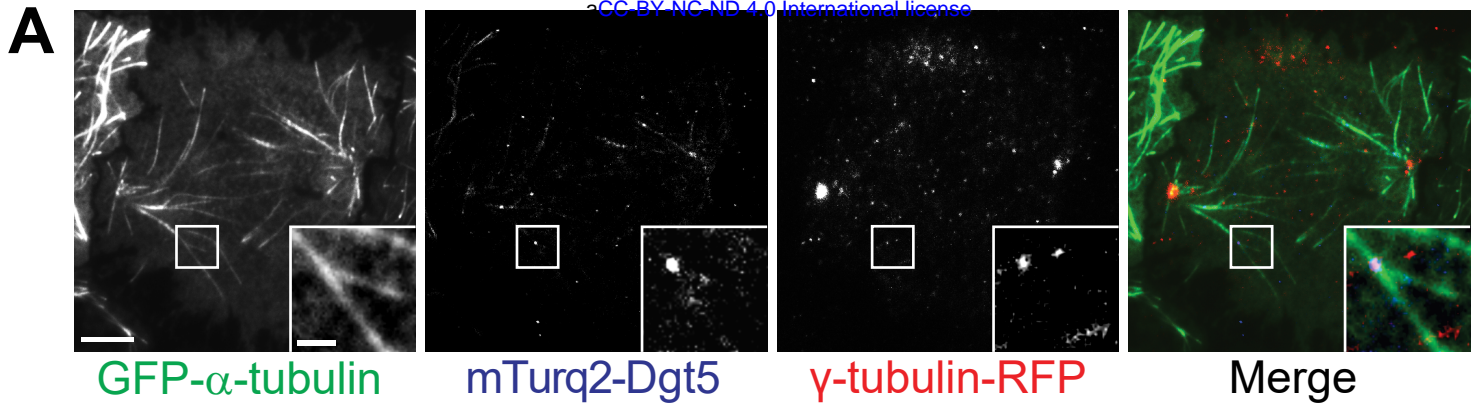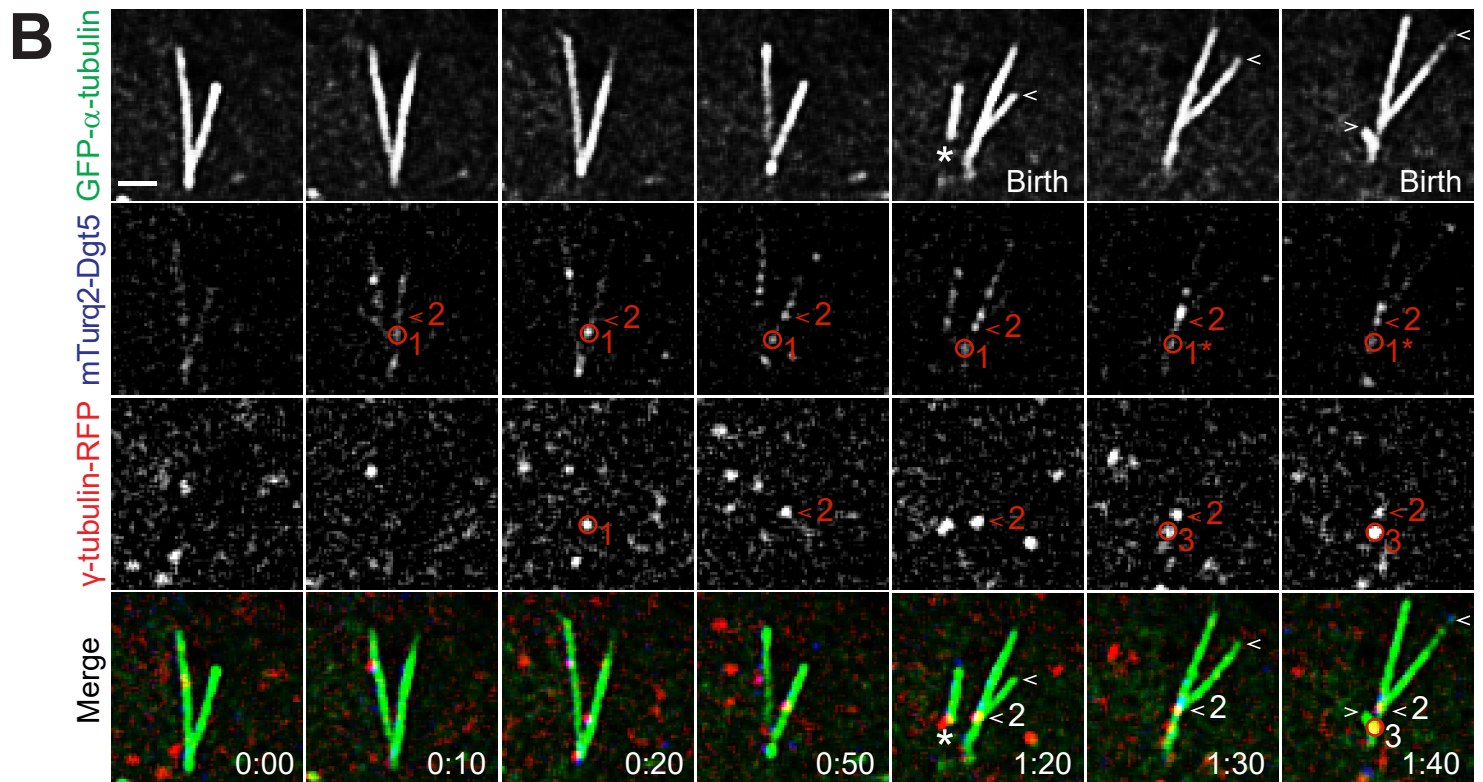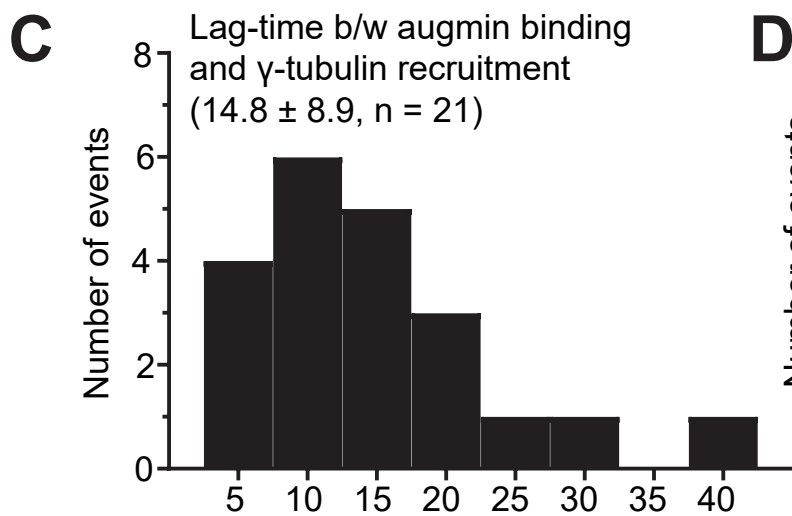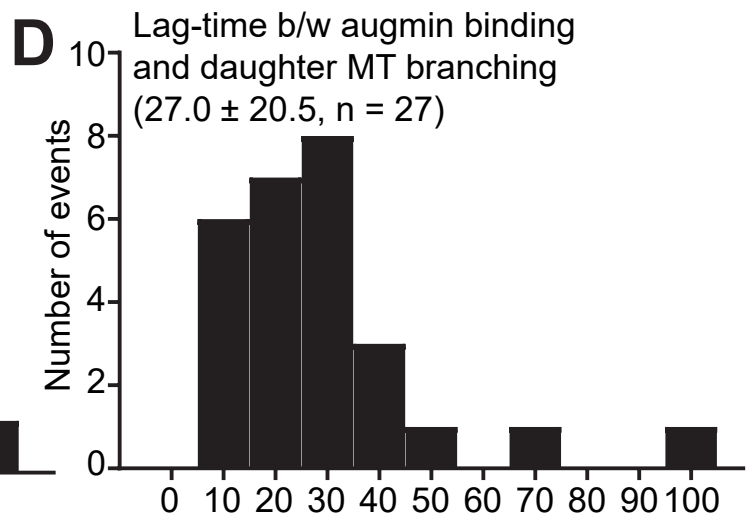

## Figure 3

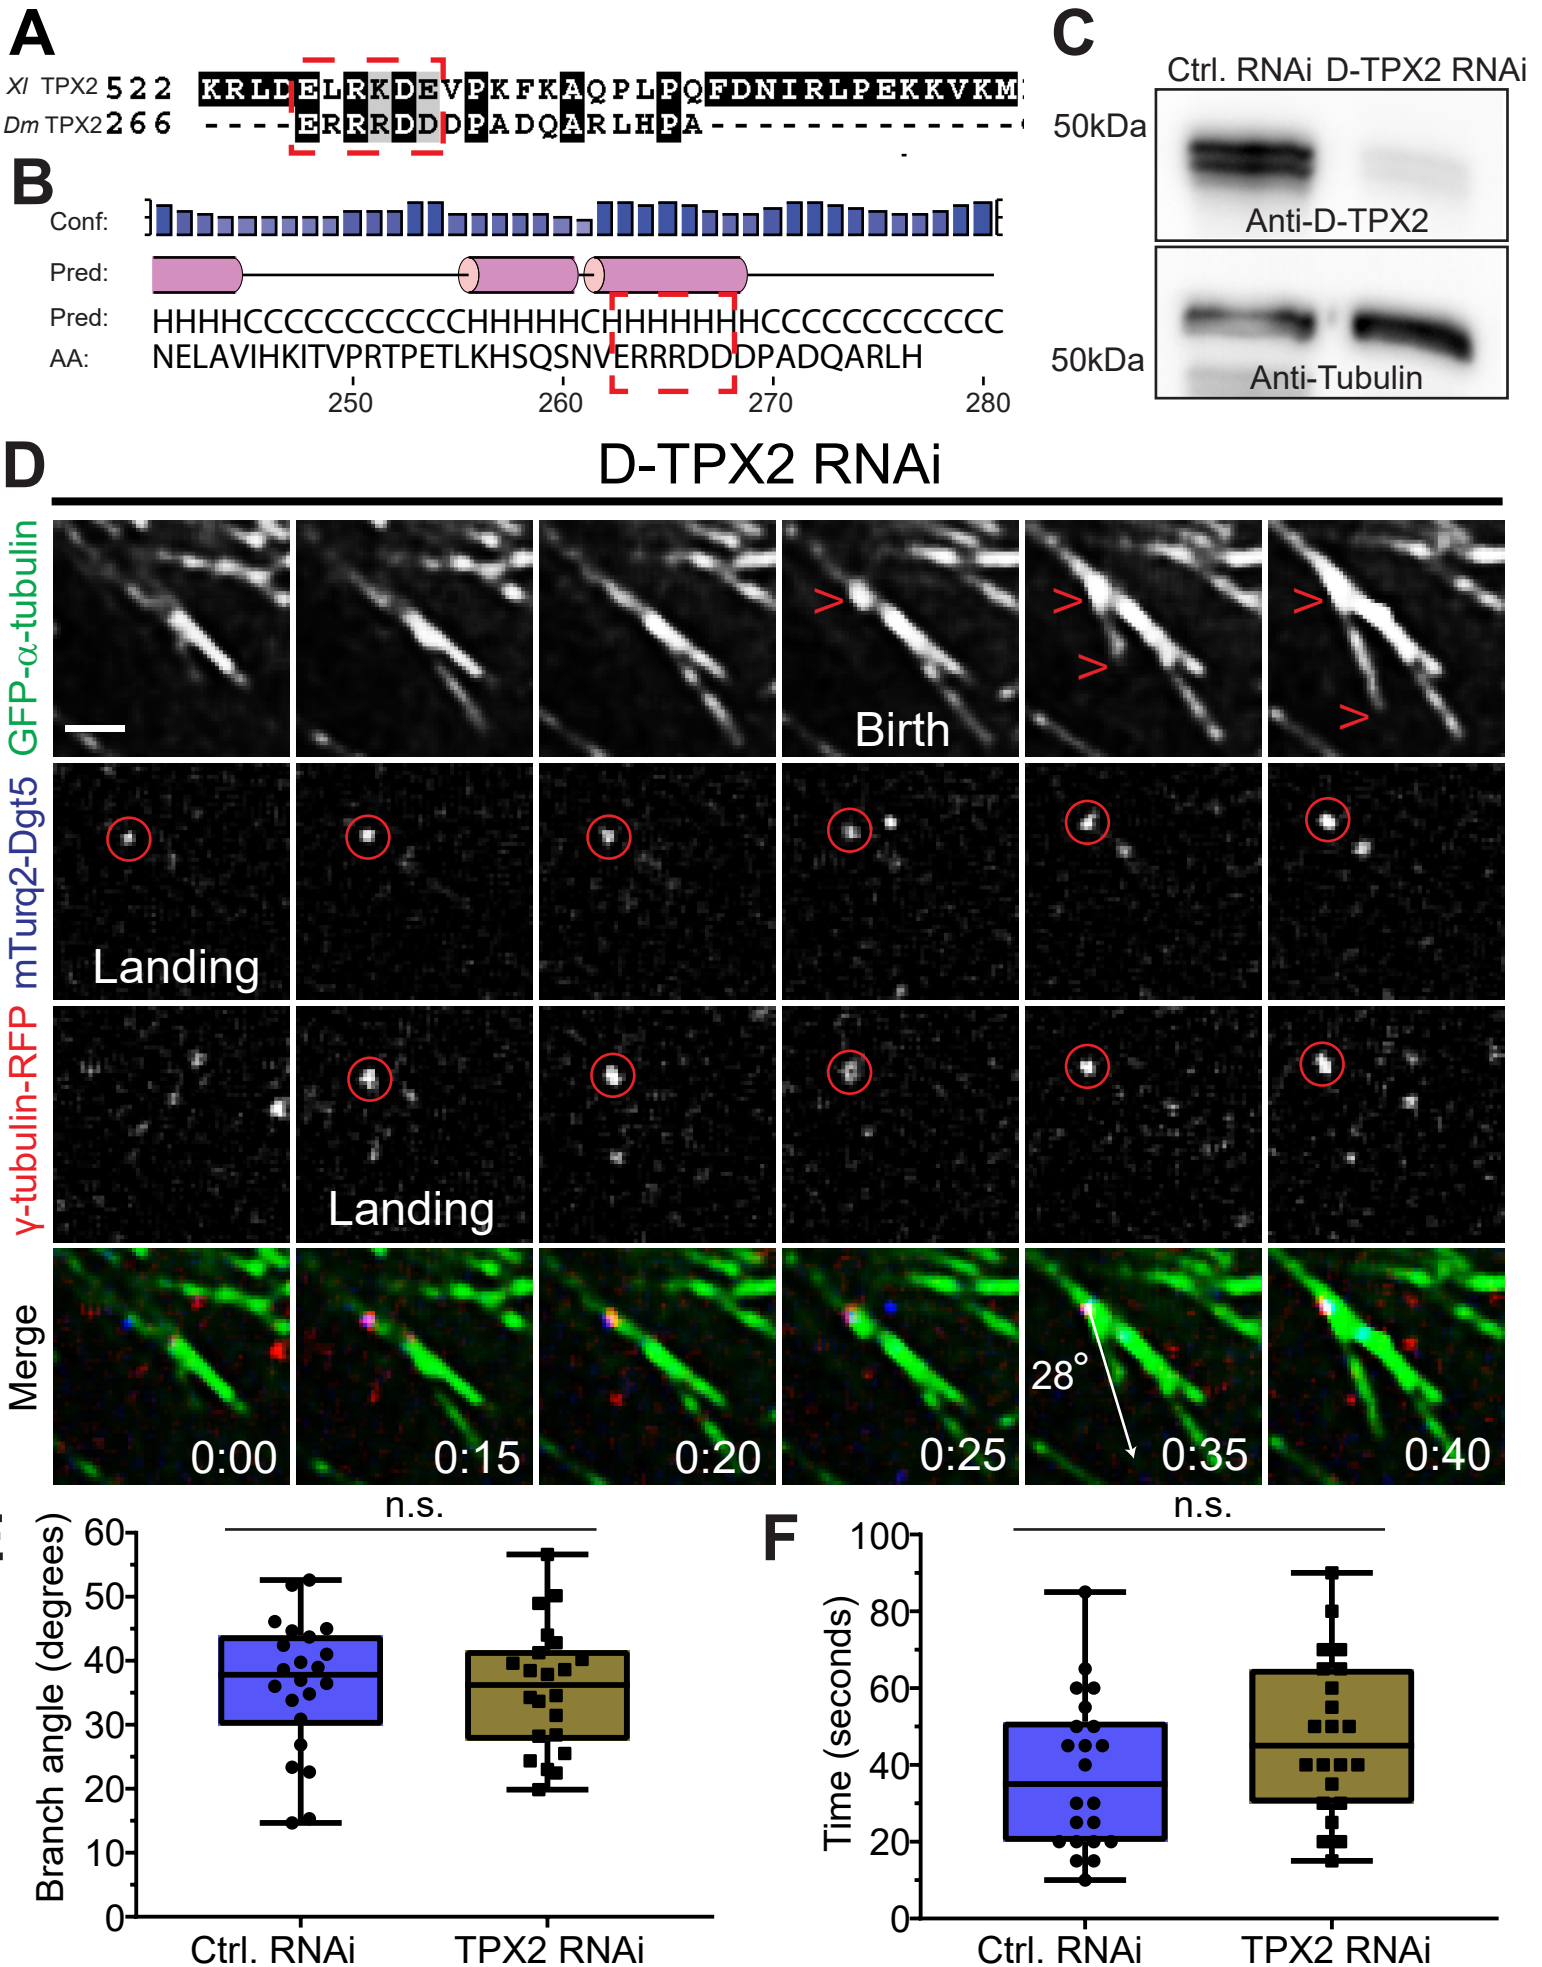

## Figure 4

**A**

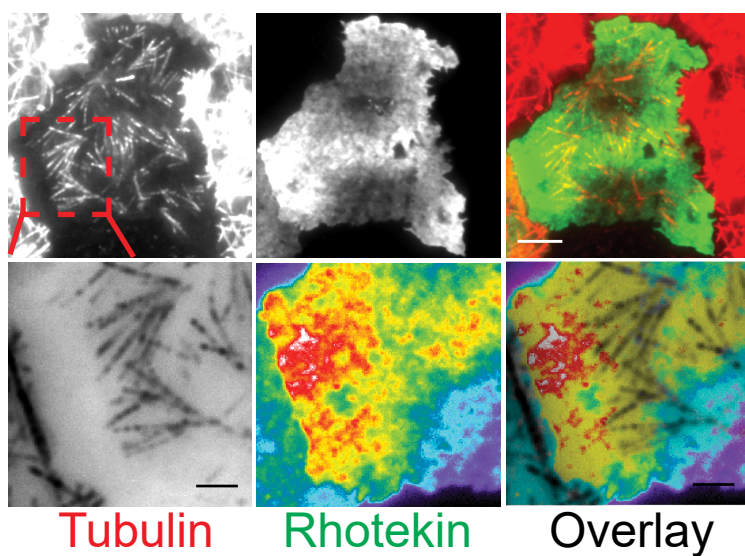

**B**

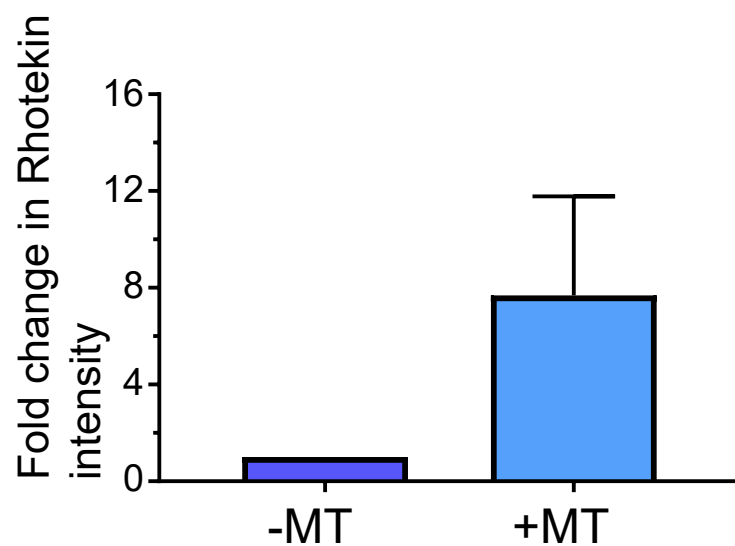

**C**

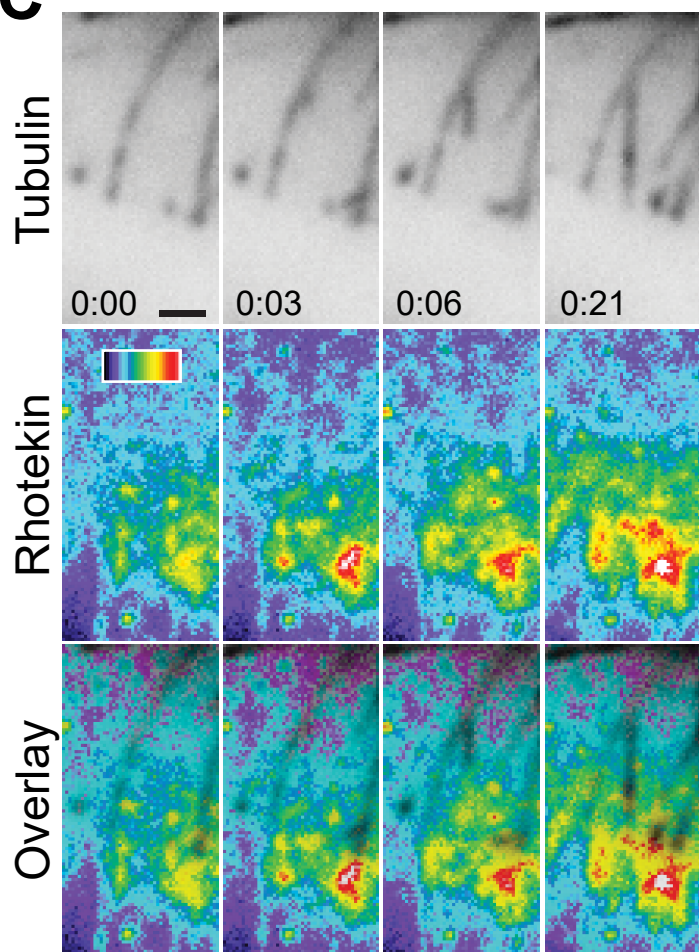

**D**

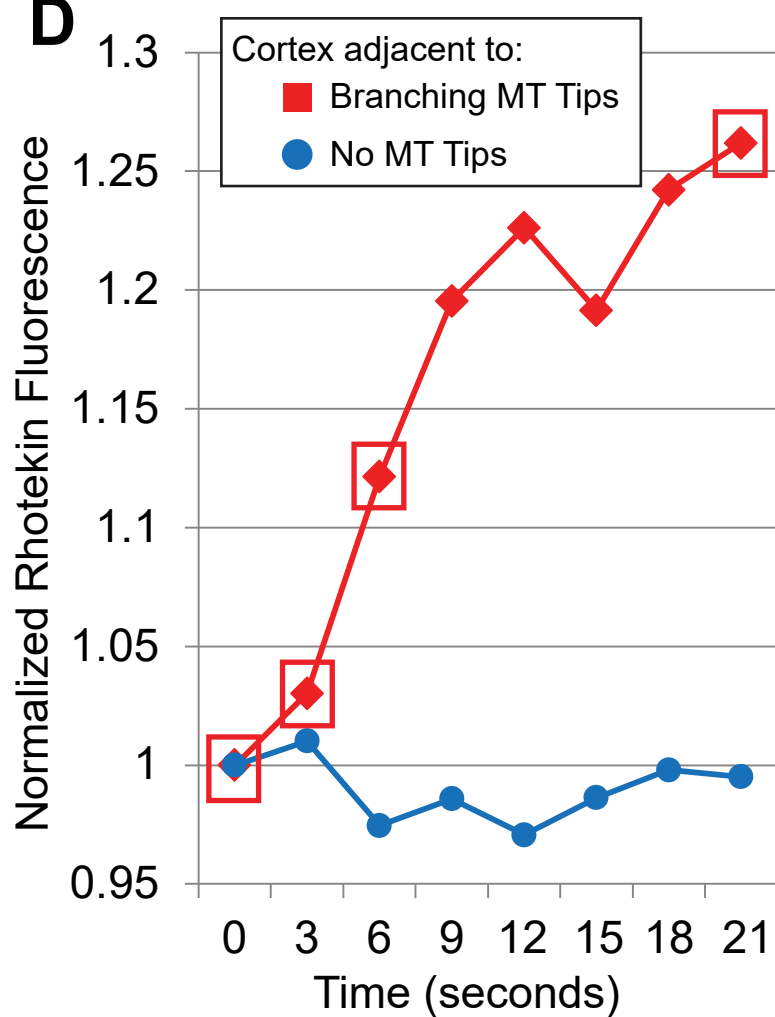



# Figure 5

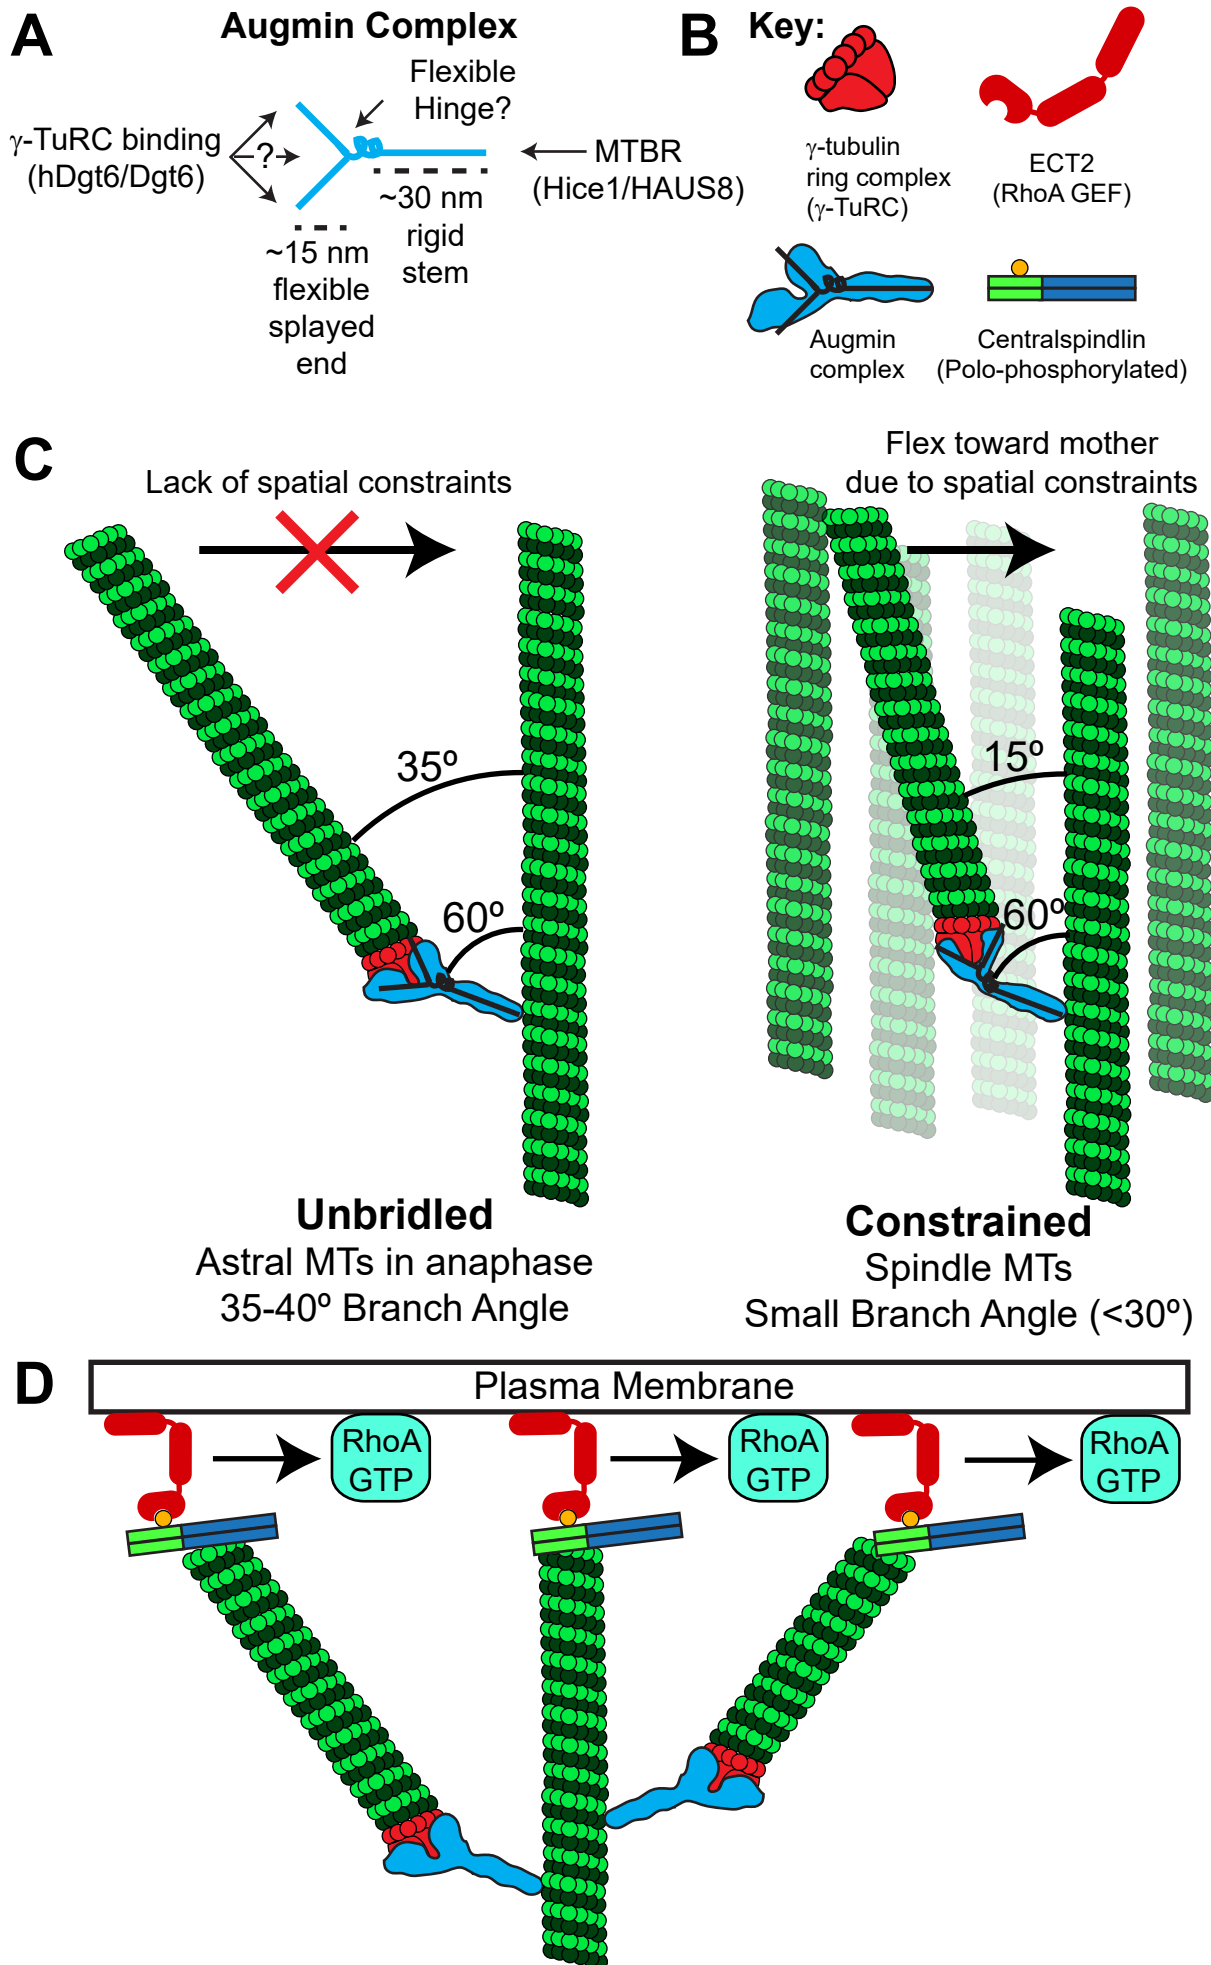

## Supplemental Figure 1

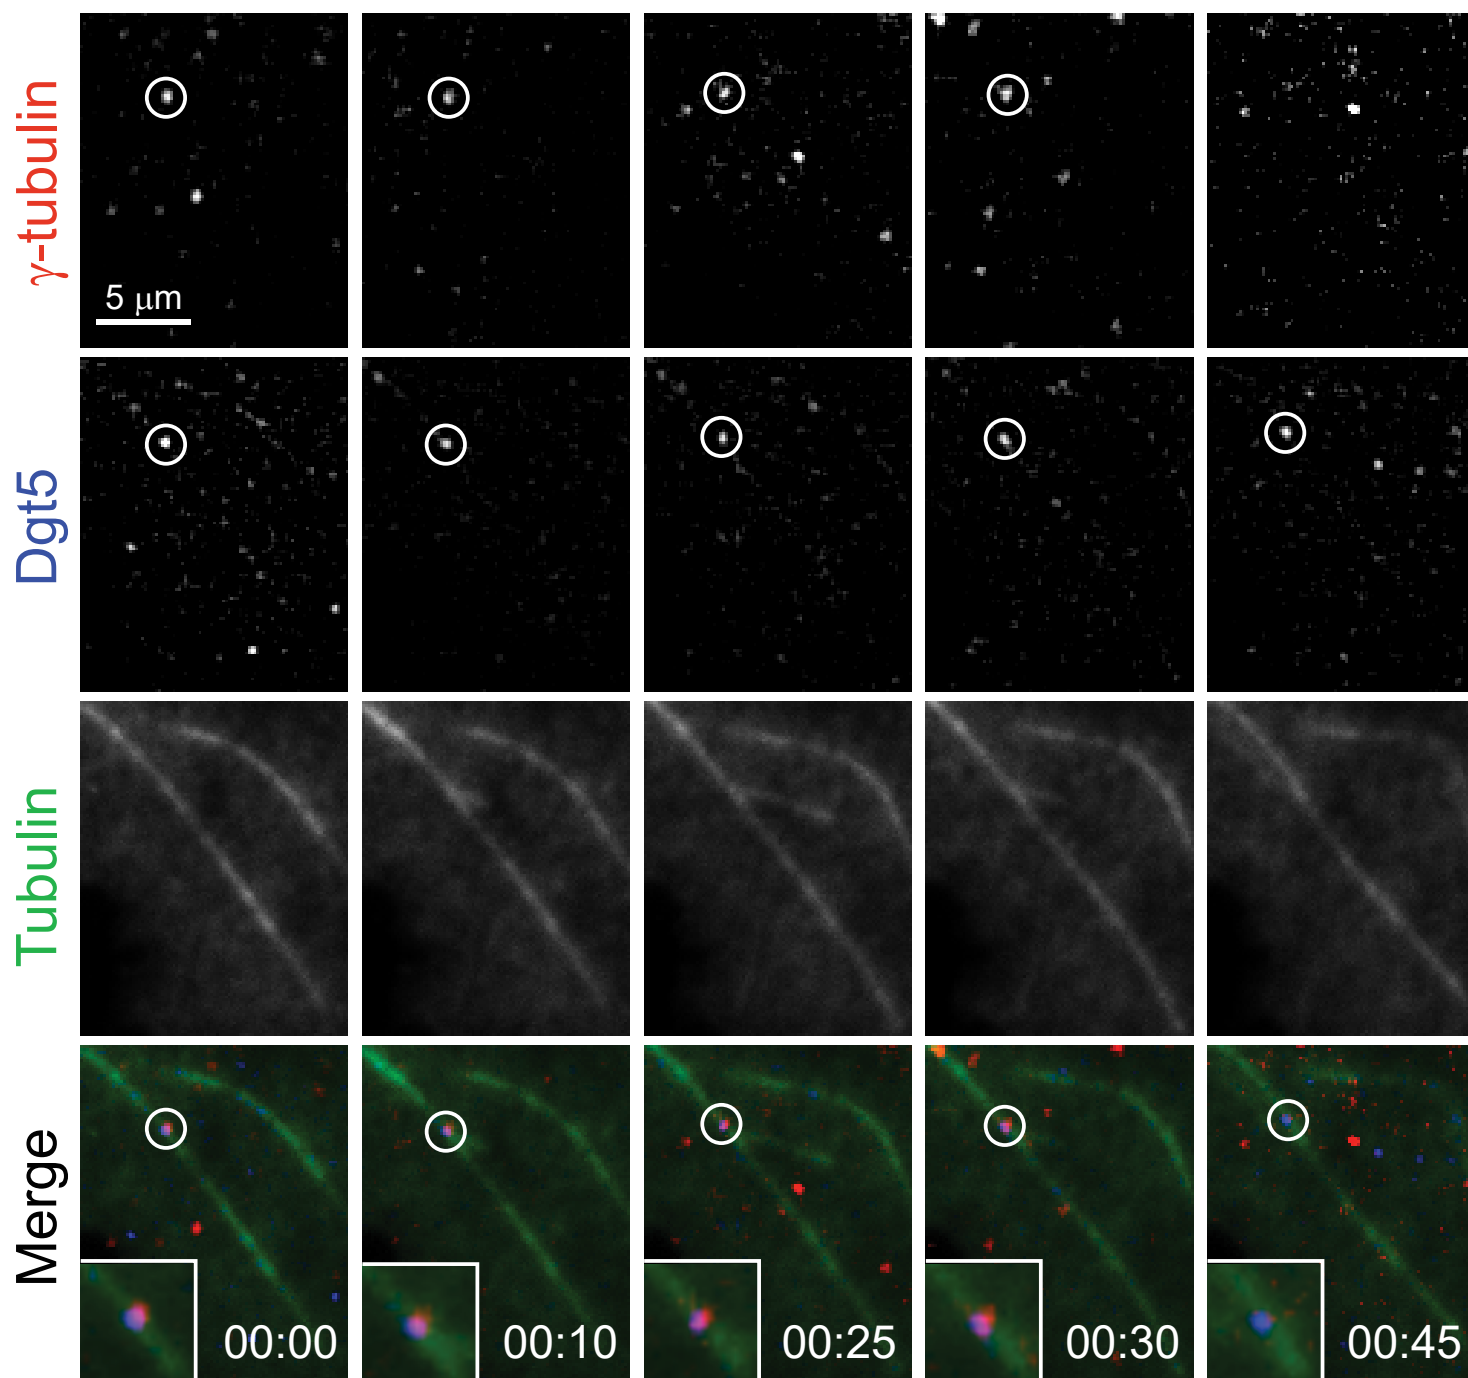

Source: https://www.biorxiv.org/content/10.1101/613463v2.full.pdf
